# Supplementary material for: The design of flower-like C–MnO2 nanosheets on carbon cloth toward high-performance flexible zinc-ion batteries
Source: Royal Society of Chemistry journal article supplement (doi:10.1039/d0ta12009j), 2021-01-01
Supplement: d0ta12009j1.pdf [file d0ta12009j1.pdf]

## Supporting Information

### **Design flower-like C-MnO<sub>2</sub> nanosheets on carbon cloth: toward high-performance flexible zinc-ion batteries**

Fei Li<sup>1,†</sup>, Yi-Lin Liu<sup>1,†</sup>, Gui-Gen Wang<sup>\*,†</sup>, Dong Yan<sup>††</sup>, Gui-Zhong Li<sup>†</sup>, Hai-Xu Zhao<sup>†</sup>,  
Hua-Yu Zhang<sup>\*,†</sup>, Hui-Ying Yang<sup>\*,††</sup>

<sup>†</sup>*Shenzhen Key Laboratory for Advanced Materials, School of Materials Science and Engineering, Harbin Institute of Technology, Shenzhen, Shenzhen 518055, China*

<sup>††</sup>*Pillar of Engineering Product Development, Singapore University of Technology and Design, 8 Somapah Road, Singapore 487372, Singapore*

*Corresponding Authors:*

*(Gui-Gen Wang) [wangguigen@hit.edu.cn](mailto:wangguigen@hit.edu.cn);*

*(Hua-Yu Zhang) [hyzhang@hit.edu.cn](mailto:hyzhang@hit.edu.cn);*

*(Hui Ying Yang) [yanghuiying@sutd.edu.sg](mailto:yanghuiying@sutd.edu.sg)*

*1 These two authors contributed equally to this work.*

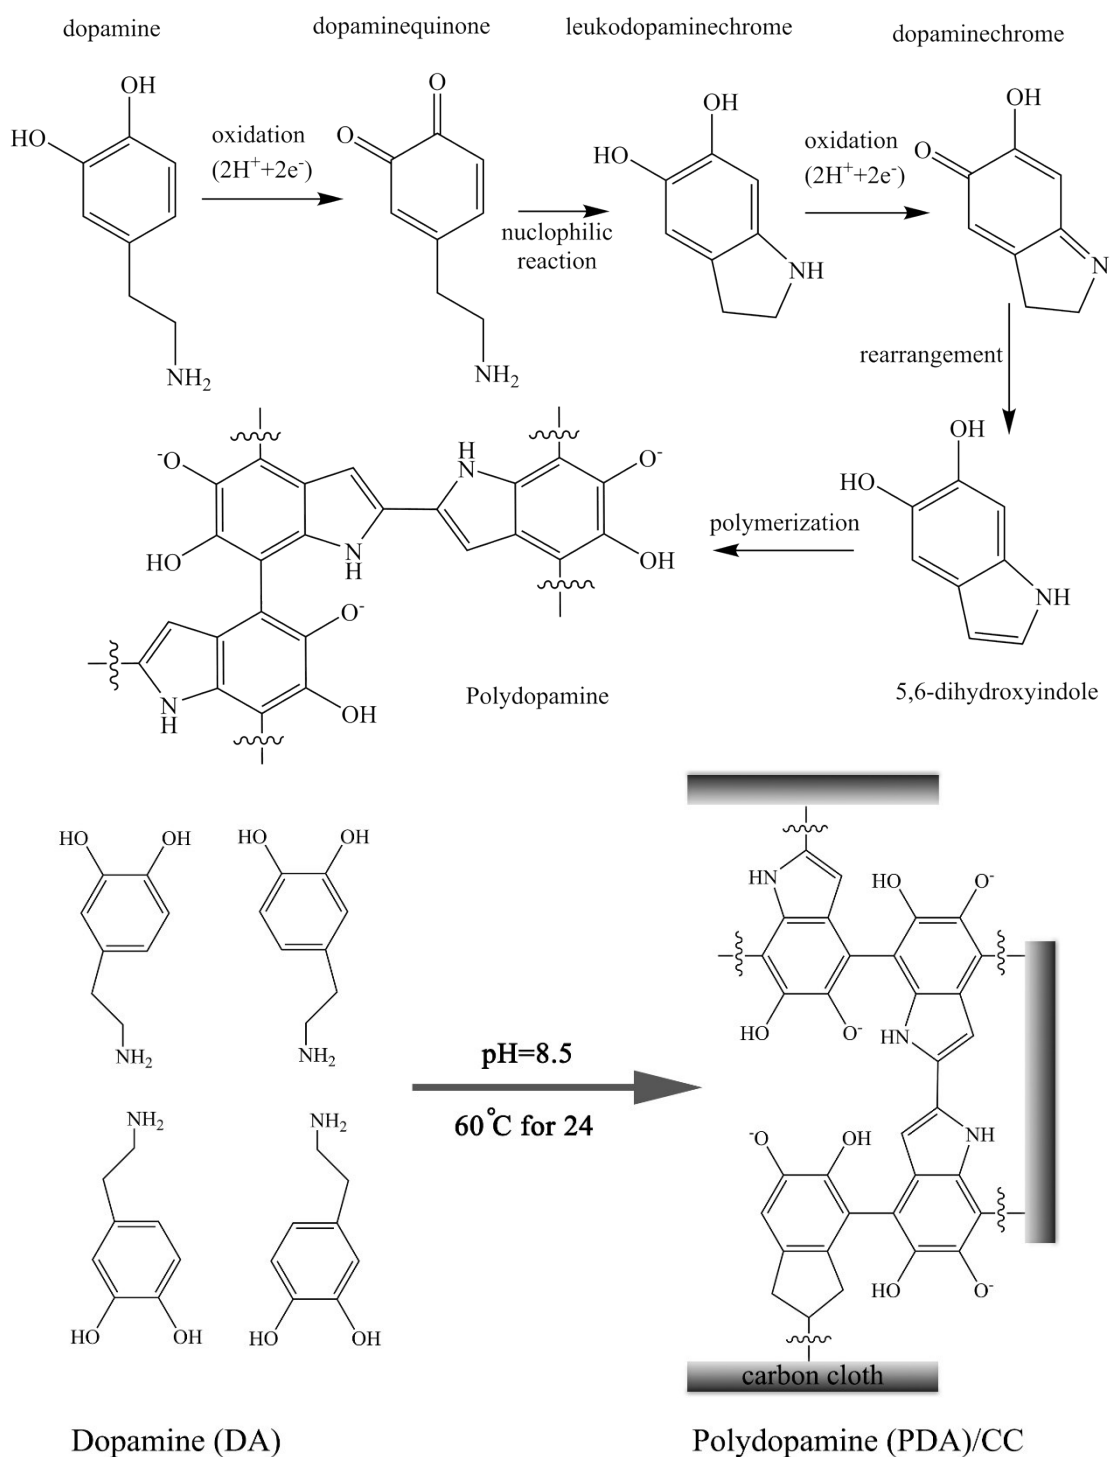

**Fig. S1** Self-polymerization of dopamine (DA) on carbon cloth (CC) with the chemical equation.

Under oxidation condition, e.g. alkaline pH, dihydroxyl group protons in dopamine are deprotonated, becoming dopamine-quinone, which subsequently rearranges via intramolecular cyclization to the formation of leukodopaminechrome. Further oxidation and rearrangement leads to 5,6-dihydroxyindole, which further

oxidation causes inter-molecular cross-linking to yield a polymer that have similar structure with the bio-pigment melanin. The polydopamine-coated surface subsequently reacts with a variety of molecules via Schiff-base and Michael addition chemistries [1-3].

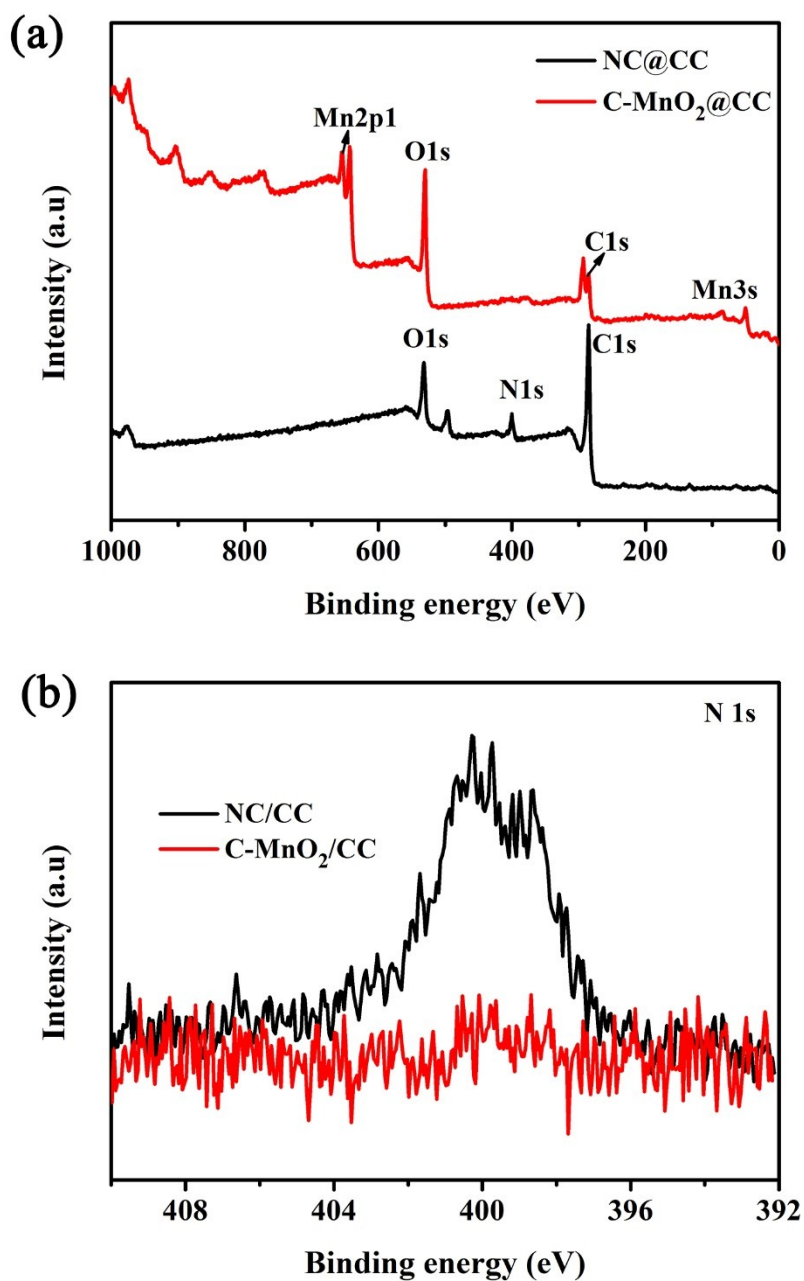

**Fig. S2** XPS spectra of C-MnO<sub>2</sub>/CC electrode materials: (a) XPS survey spectra, (b) High-resolution XPS spectra of N 1s.

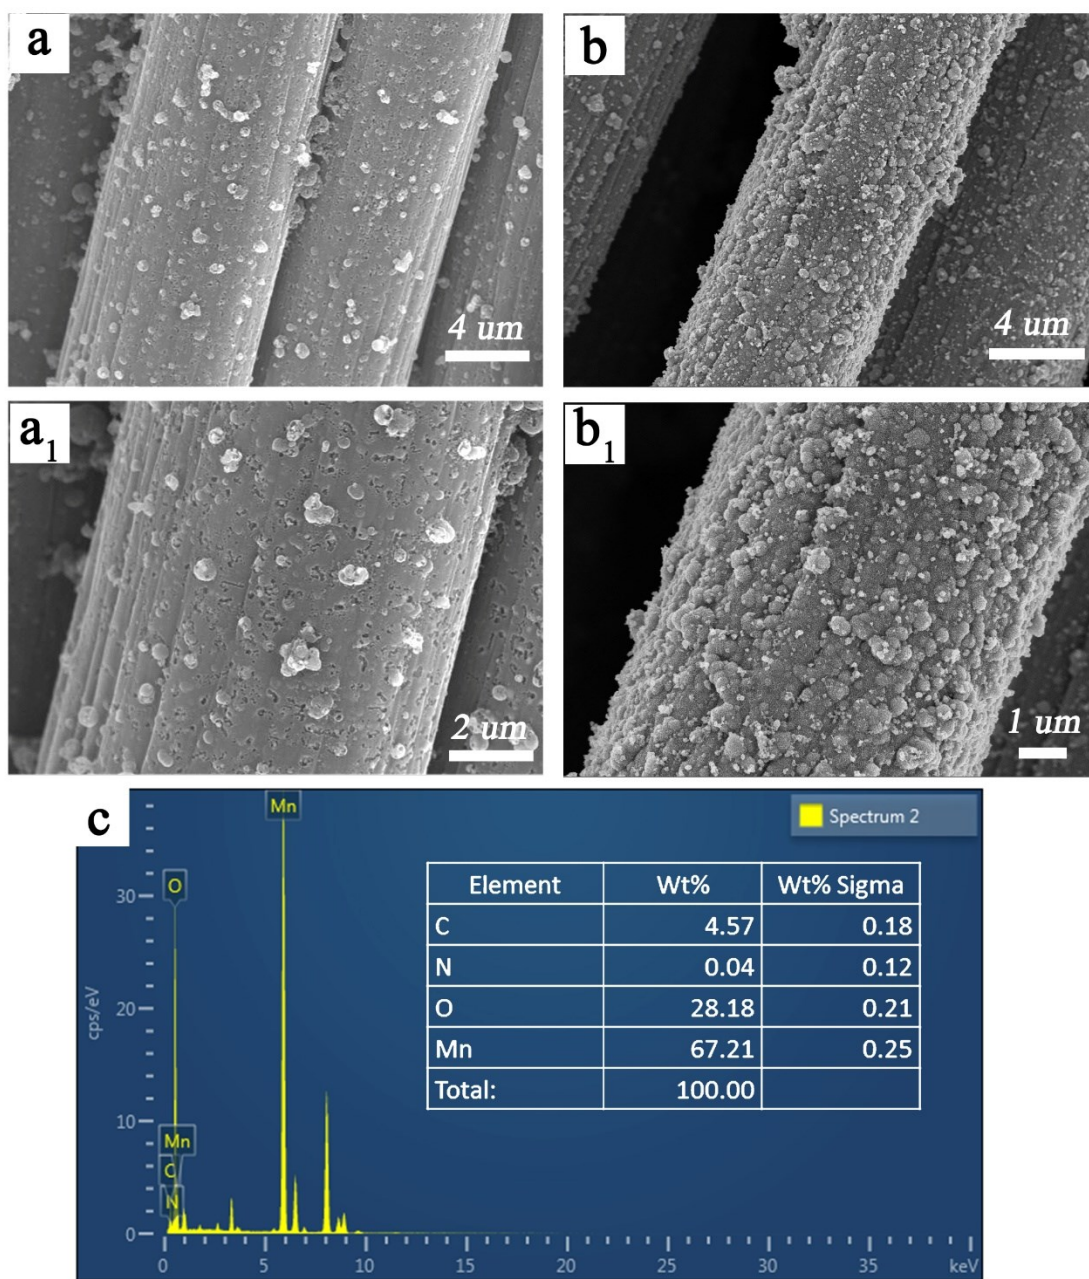

**Fig. S3** SEM images of NC-CC (a, a<sub>1</sub>) and C-MnO<sub>2</sub>/CC (b, b<sub>1</sub>), (c) EDS spectrum of C-MnO<sub>2</sub> with the elemental composition at TEM pattern.

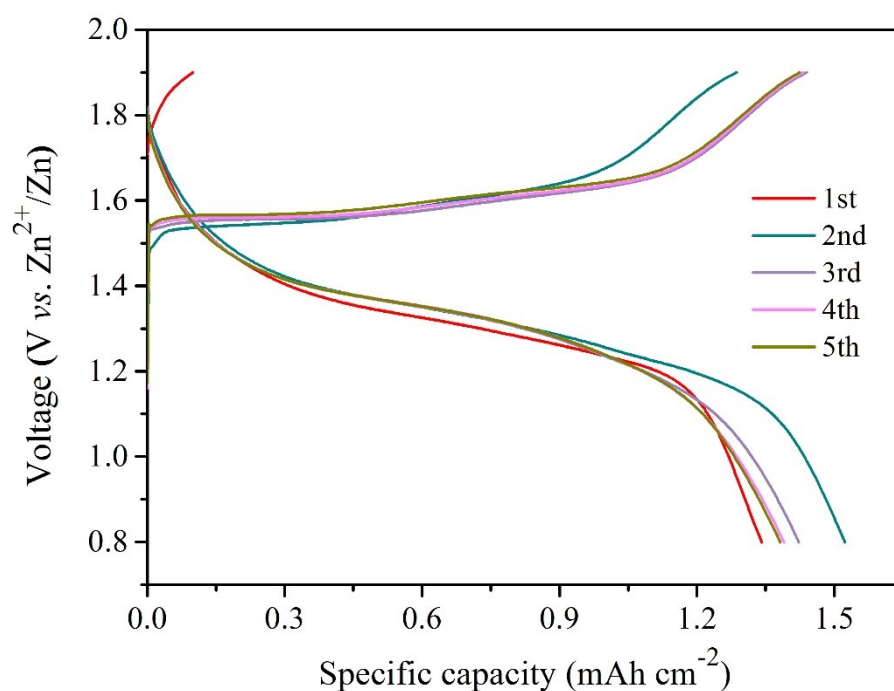

**Fig. S4** The initial five cyclic GCD curves of C-MnO<sub>2</sub>/CC at current density of 1.0 mA cm<sup>-2</sup>.

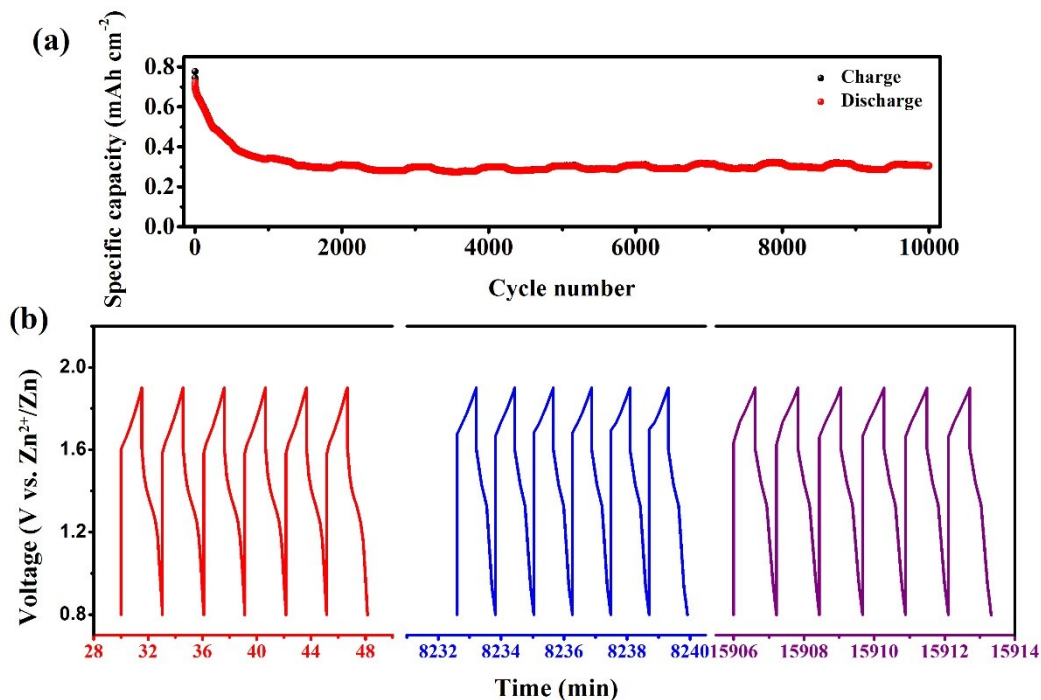

**Fig. S5** Cycling test of Zn//C-MnO<sub>2</sub> battery at 10 mA cm<sup>-1</sup>: (a) The long-term cycling stability, (b) GCD curves of 45~50 cycles, 4995~5000 cycles, and 9995~10000 cycles.



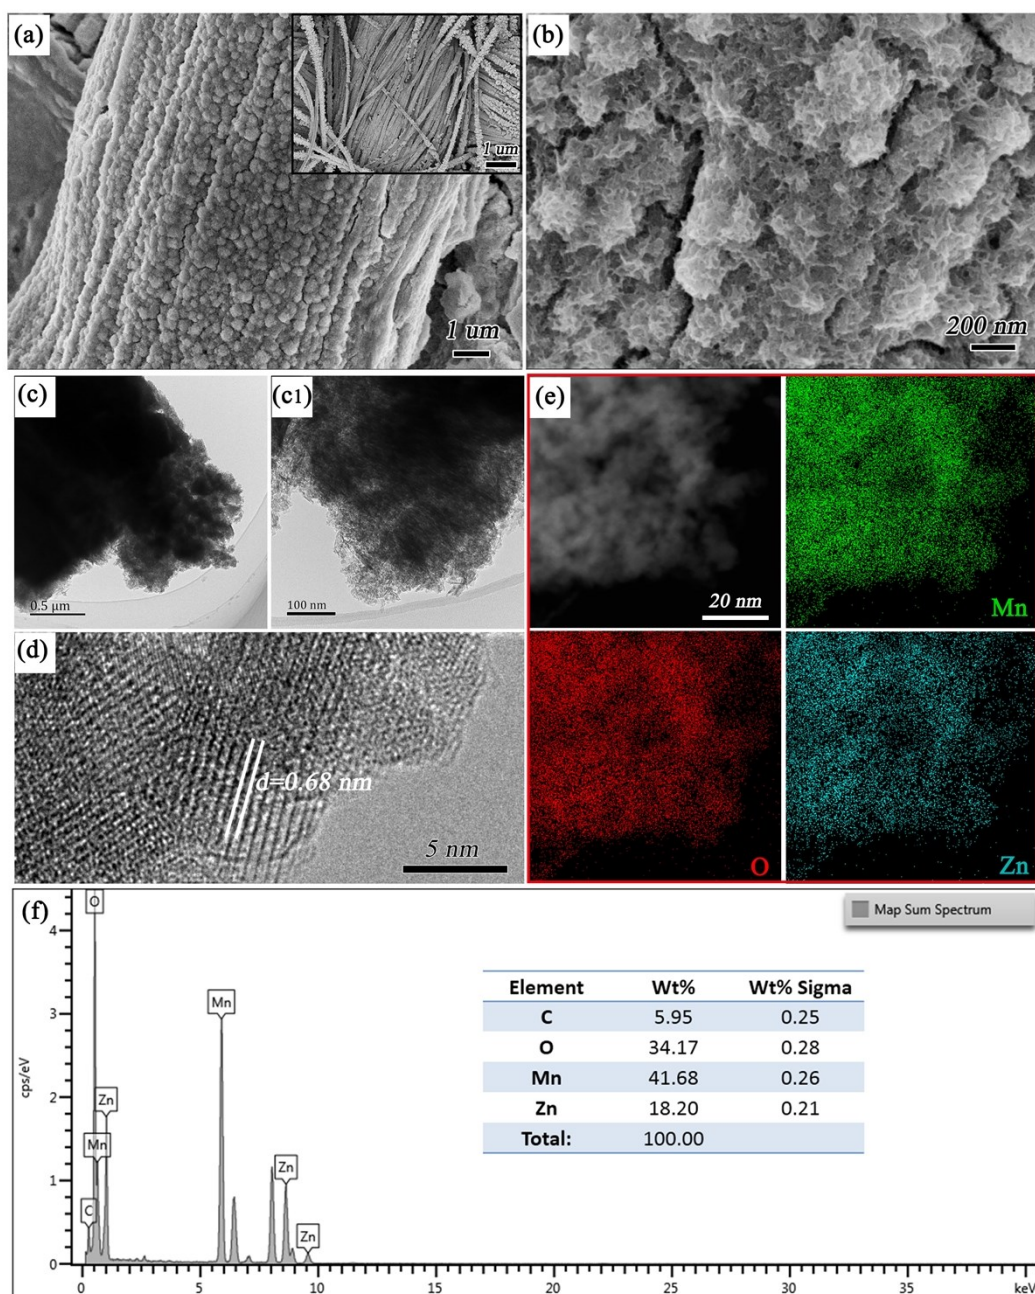

**Fig. S6** The SEM and TEM images of C-MnO<sub>2</sub>@CC after cycling for 10000 times. As the SEM images of C-MnO<sub>2</sub>@CC (a) with different magnifications (b) shown that C-MnO<sub>2</sub> still tight cover on the carbon fibre with less fall off and keep the “flower-like” nanosheet-like morphology; TEM images (c-c1) and HRTEM images (d) further confirm the MnO<sub>2</sub> retain nanosheet structure and 0.68 nm of lattice spacing; (e) Selected-area elemental mappings of Mn, O, and Zn displays that the Zn<sup>2+</sup> insert into the MnO<sub>2</sub> and uniform distribution. (f) EDS spectra of C-MnO<sub>2</sub> with the elemental compositions at TEM pattern reveals that the content of C, O, Mn, and Zn is 5.95, 34.17, 41.68, and 18.2 wt%, respectively.

**Table S1.** Comparison of flexible MnO<sub>2</sub> cathodes for zinc ion batteries.

| Electrode                                                  | Electrolyte                                                     | Specific capacity                                      | Current density                                                                 | Reference                                                    |
|------------------------------------------------------------|-----------------------------------------------------------------|--------------------------------------------------------|---------------------------------------------------------------------------------|--------------------------------------------------------------|
| N-CNSs@MnO <sub>2</sub> //N-CNSs@Zn battery                | 2 M ZnSO <sub>4</sub> + 0.2 M MnSO <sub>4</sub>                 | 0.698 mAh cm <sup>-2</sup>                             | 0.46 mA cm <sup>-2</sup><br>(2.3 mg cm <sup>-2</sup> ; 0.2 A g <sup>-1</sup> )  | <i>Energy Storage Materials</i> . <b>2020</b> , 29, 52-59    |
| polyester-CNTs@MnO <sub>2</sub> // Zn-CNTs battery         | 2 M ZnSO <sub>4</sub> + 0.2 M MnSO <sub>4</sub>                 | 0.96 mAh cm <sup>-2</sup>                              | 1 mA cm <sup>-2</sup><br>(1.9 mg cm <sup>-2</sup> )                             | <i>Advanced Energy Materials</i> . <b>2019</b> , 9, 1901469  |
| Na:MnO <sub>2</sub> /GCF//Zn/GCF battery                   | 2 M ZnSO <sub>4</sub> + 0.1 M MnSO <sub>4</sub>                 | 0.573 mAh cm <sup>-2</sup>                             | 0.15 mA cm <sup>-2</sup><br>(1.5 mg cm <sup>-2</sup> ; 0.1 A g <sup>-1</sup> )  | <i>Adv. Functional Materials</i> . <b>2020</b> , 30, 1907120 |
| Zn <sub>x</sub> MnO <sub>2</sub> //ACC Zn-HSCs             | 2 M ZnSO <sub>4</sub> + 0.4 M MnSO <sub>4</sub>                 | 0.97 mAh cm <sup>-2</sup>                              | 2 mA cm <sup>-2</sup>                                                           | <i>Small</i> , <b>2020</b> , 2000091.                        |
| MnO <sub>2</sub> /Zn battery                               | 2 M ZnSO <sub>4</sub> + 0.1 M MnSO <sub>4</sub>                 | 1.1 mAh cm <sup>-2</sup>                               | 1.5 mA cm <sup>-2</sup><br>(5 mg cm <sup>-2</sup> )                             | <i>Advanced Science</i> . <b>2020</b> , 7, 1902795           |
| P-MnO <sub>2-x</sub> @VMG//Zn@VMG battery                  | 2 M ZnSO <sub>4</sub> + 0.2 M MnSO <sub>4</sub>                 | 1.24 mAh cm <sup>-2</sup>                              | 2 mA cm <sup>-2</sup><br>(4.1 mg cm <sup>-2</sup> ; 0.5 A g <sup>-1</sup> )     | <i>Small Methods</i> , <b>2020</b> , 1900828                 |
| quasi-solid-state Zn-CMOP (MnO <sub>2</sub> /PEDOT) device | 2 M ZnCl <sub>2</sub> + 0.4 M MnSO <sub>4</sub>                 | 1.1 mAh cm <sup>-2</sup>                               | 2 mA cm <sup>-2</sup><br>(3 mg cm <sup>-2</sup> )                               | <i>Small Methods</i> <b>2019</b> , 3, 1900525                |
| OD-ZMO//Zn and OD-ZMO@PEDOT //Zn battery                   | 1 M ZnSO <sub>4</sub>                                           | 1.05 mAh cm <sup>-2</sup><br>1.37 mAh cm <sup>-2</sup> | 0.5 mA cm <sup>-2</sup><br>(6 mg cm <sup>-2</sup> ; 6.2 mg cm <sup>-2</sup> )   | <i>Energy Storage Materials</i> . <b>2019</b> , 21, 154-161  |
| Zn-δ-NMOH//Zn/CC                                           | 2 M ZnCl <sub>2</sub> + 0.2 M MnSO <sub>4</sub>                 | 1.43 mAh cm <sup>-2</sup>                              | 1.0 mA cm <sup>-2</sup><br>(2~3 mg cm <sup>-2</sup> ; 0.380 A g <sup>-1</sup> ) | <i>ACS Nano</i> . <b>2019</b> , 13, 10643-10652              |
| MnO <sub>2</sub> @PEDOT// Zn device                        | 1 M Zn(NO <sub>3</sub> ) <sub>2</sub> + 0.1 M MnSO <sub>4</sub> | 1.02 mAh cm <sup>-2</sup>                              | 2 mA cm <sup>-2</sup><br>(3.6 mg cm <sup>-2</sup> ; 0.37 A g <sup>-1</sup> )    | <i>Advanced Materials</i> . <b>2017</b> , 29, 1700274        |
| N-CC@MnO <sub>2</sub> //N-CC@Zn                            | 2 M ZnCl <sub>2</sub> +0.4 M                                    |                                                        | 1.6 mA cm <sup>-2</sup>                                                         | Journal of Materials                                         |

|                                                                                   |                                                    |                                                              |                                                   |                                          |
|-----------------------------------------------------------------------------------|----------------------------------------------------|--------------------------------------------------------------|---------------------------------------------------|------------------------------------------|
|                                                                                   |                                                    |                                                              | 0.5 A g <sup>-1</sup> )                           | Chemistry A.<br>2017, 5, 14838-<br>14846 |
| C-MnO <sub>2</sub> /CC//Zn battery<br>and<br>C-MnO <sub>2</sub> /CC//Zn/CC device | 2 M ZnSO <sub>4</sub> + 0.2<br>M MnSO <sub>4</sub> | 1.3 mAh cm <sup>-2</sup><br>and<br>0.98 mAh cm <sup>-2</sup> | 1 mA cm <sup>-2</sup><br>(5 mg cm <sup>-2</sup> ) | This work                                |

**Table S2.** The Rs and Rp value at of the Zn//C-MnO<sub>2</sub> batteries at different state corresponding to Fig. 2e.

| Batteries  | Rs (Ω) | Rp (Ω) |
|------------|--------|--------|
| Pristine   | 15.88  | 44.51  |
| 10 cycles  | 14.5   | 50.18  |
| 50 cycles  | 13.9   | 54.15  |
| 100 cycles | 12.69  | 36.81  |

The ion diffusion coefficient was calculated based on the following equation:

$$D = R^2 \cdot T^2 / (2 \cdot A^2 \cdot n^4 \cdot F^4 \cdot m^2 \cdot \sigma^2)$$

where  $D$  is the diffusion coefficient,  $R$  is the gas constant,  $T$  is the room temperature,  $A$  is the surface area of the electrode,  $n$  is the number of the electrons per molecule attending the electronic transfer reaction,  $F$  is the Faraday constant,  $m$  is the concentration of insertion ion in the MnO<sub>2</sub>, and  $\sigma$  is the Warburg factor obtained from the fitted slope of the line  $Z' - \omega^{-1/2}$ . The resulted  $D$  were  $3.85 \times 10^{-13} \text{ cm}^2 \text{ s}^{-1}$ ,  $1.50 \times 10^{-12} \text{ cm}^2 \text{ s}^{-1}$ ,  $9.38 \times 10^{-13} \text{ cm}^2 \text{ s}^{-1}$  and  $1.86 \times 10^{-12} \text{ cm}^2 \text{ s}^{-1}$  for the pristine, 10th, 50th, and 100th discharge stage, respectively.



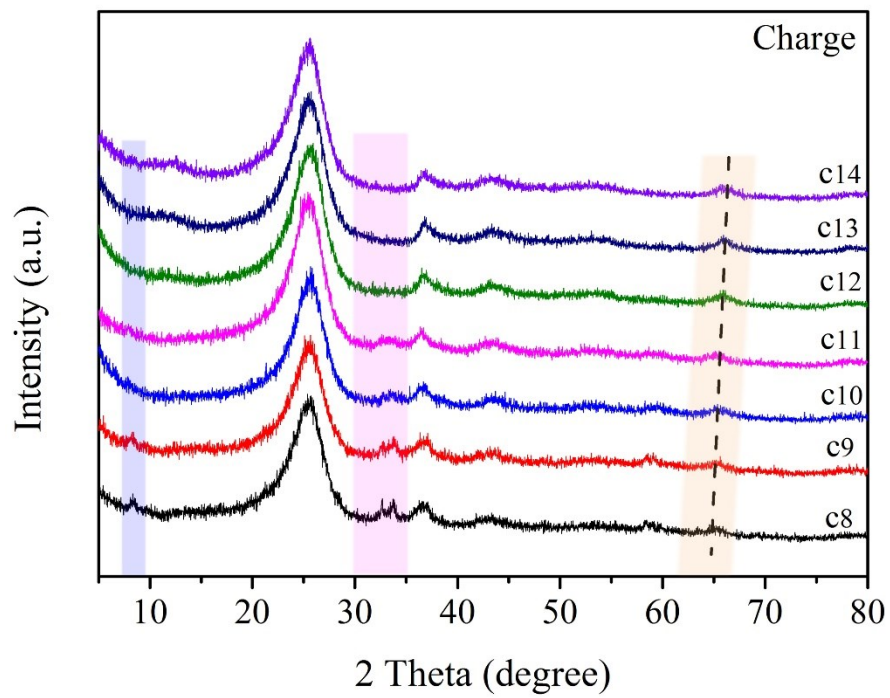

**Fig. S7** The ex-situ XRD patterns of C-MnO<sub>2</sub> electrode under charging process.

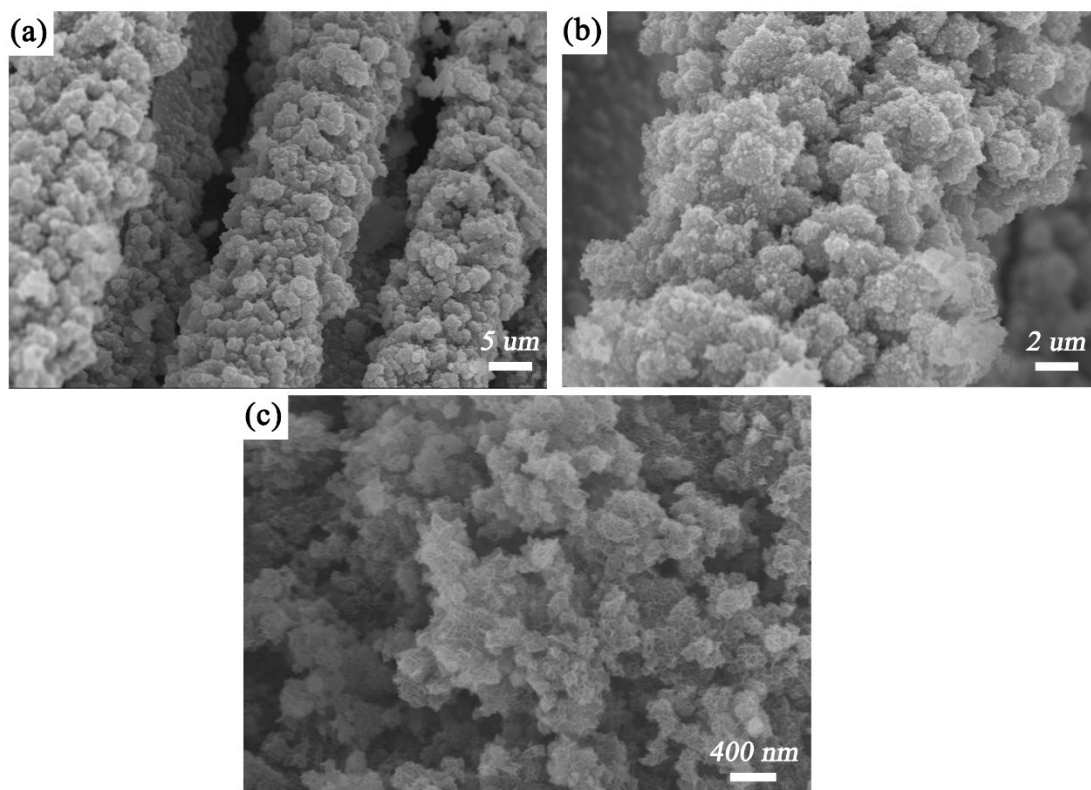

**Fig. S8** SEM images of C-MnO<sub>2</sub> electrode at d8 state with different magnifications.

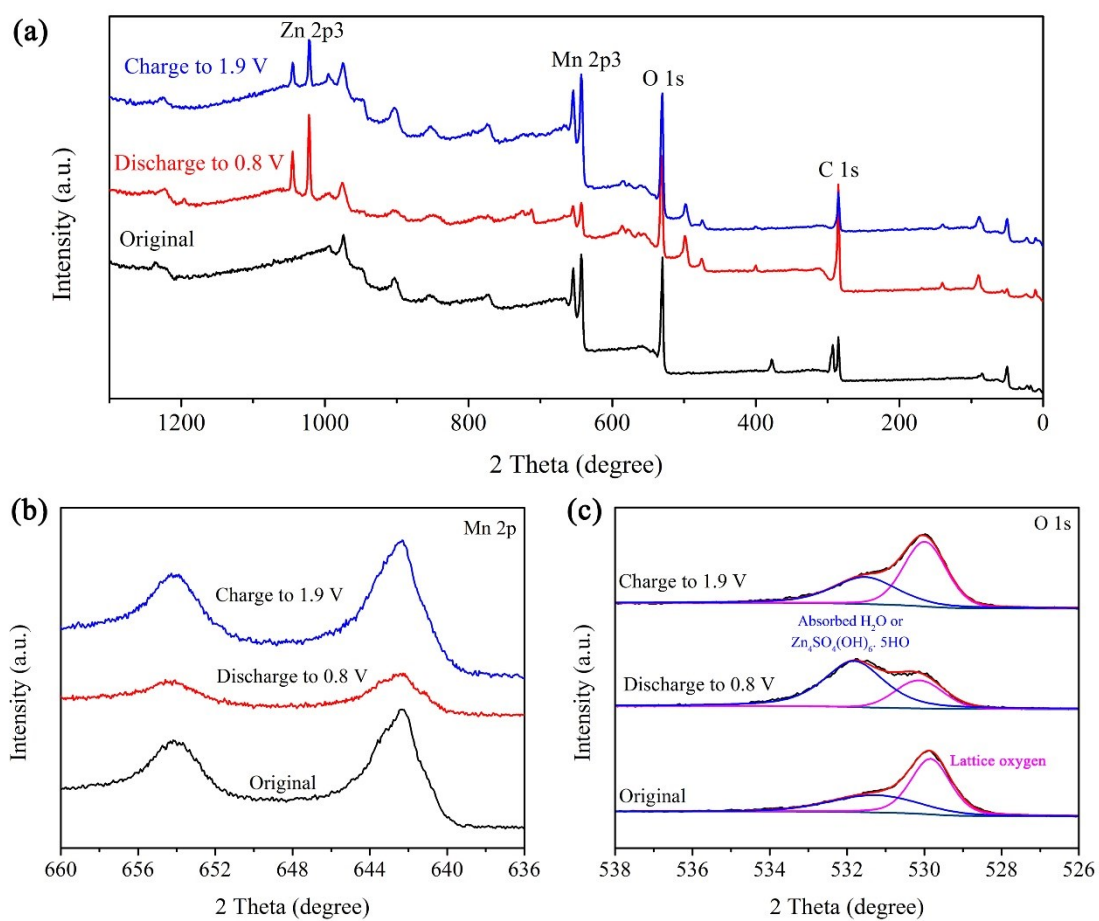

**Fig. S9** XPS of C-MnO<sub>2</sub>@CC electrode materials at original, full discharge (0.8 eV), and full charge (1.9 eV): (a) XPS survey spectra. High-resolution XPS spectra of Mn 2p (b) and O 1s (c).

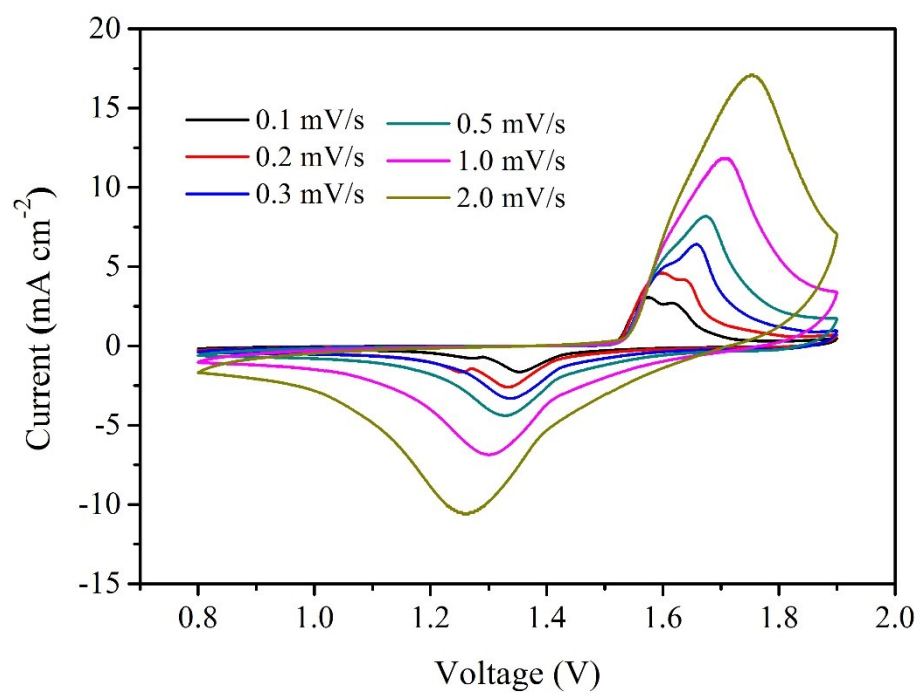

**Fig. S10** CV curves of flexible quasi-solid-state C-MnO<sub>2</sub>@CC//Zn/CC batteries at different scan rates from 0.1 to 2.0 mV s<sup>-1</sup>.

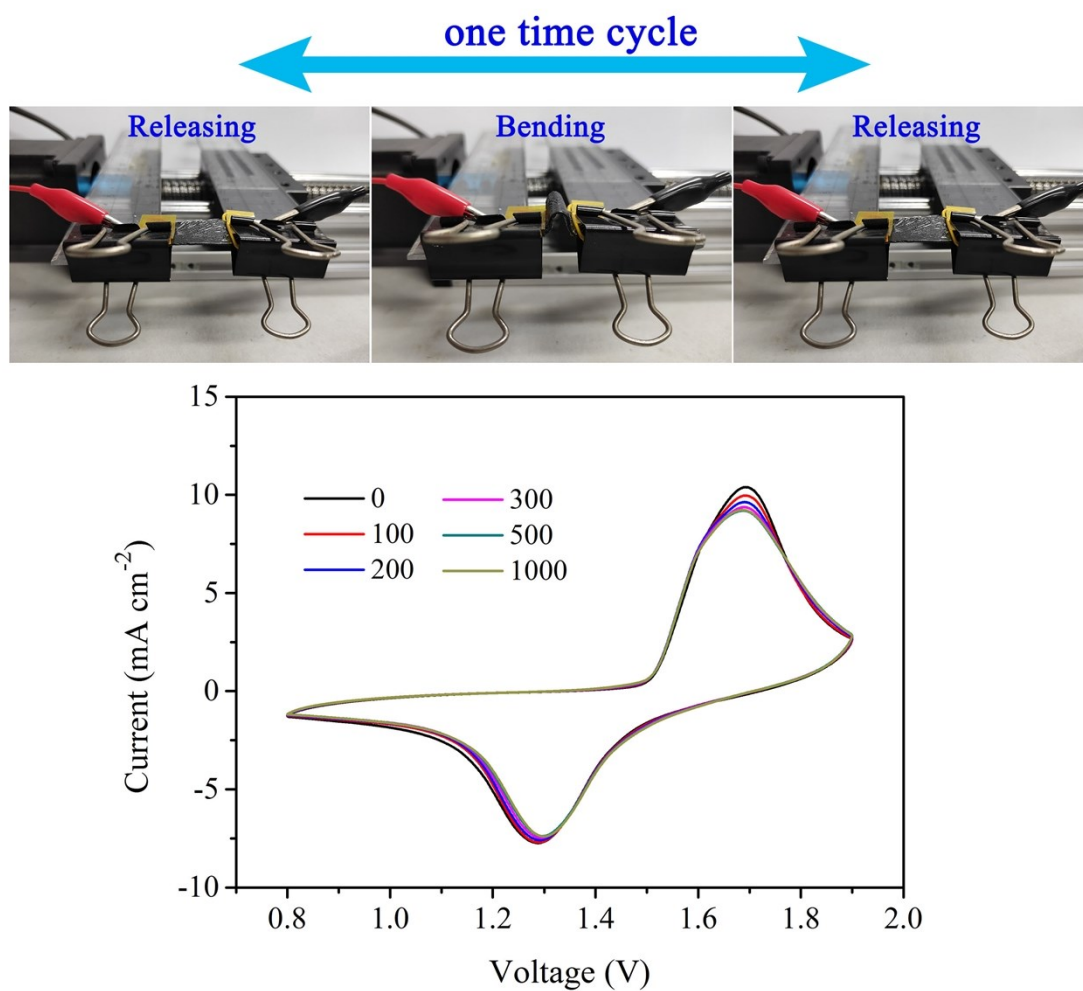

**Fig. S11** CV curves of the C-MnO<sub>2</sub>@CC//Zn/CC device collected at a scan rate of 1  $\text{mV s}^{-1}$ , in which the device were bended and then released after 100, 200, 300, 500, and 1000 times. There are digital photographs during one cycle.

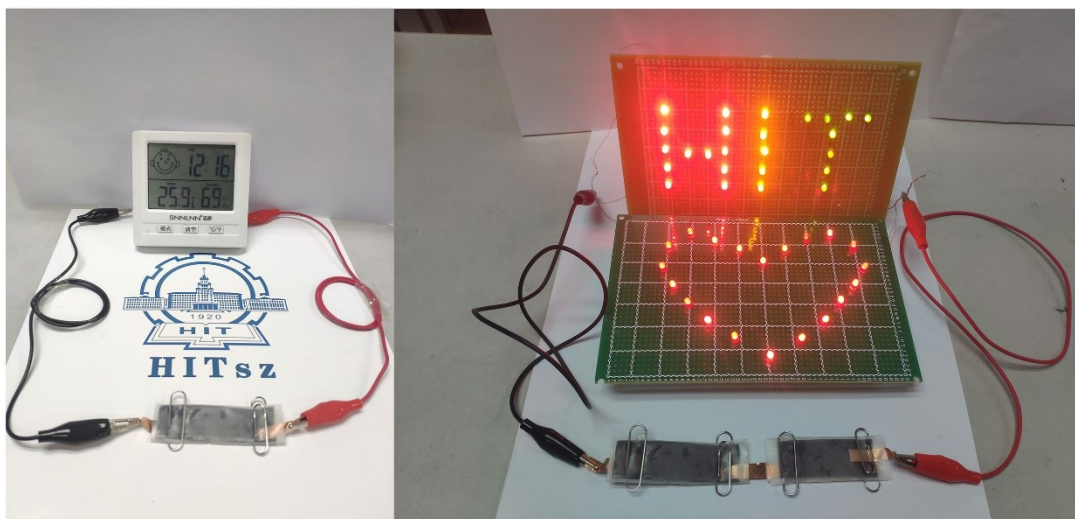

**Fig. S12** Flexible C-MnO<sub>2</sub>@CC zinc ion battery and its application, and photographs of the digital watch and LED-designed pattern powered by our batteries.

#### Reference:

- [1] Lee H , Dellatore S M , Miller W M , et al. Mussel-Inspired Surface Chemistry for Multifunctional Coatings [J]. *Science*, 2007, 318(5849):426-430.
- [2] Hong S, Na Y S, Choi S, et al. Non-Covalent Self-Assembly and Covalent Polymerization Co-Contribute to Polydopamine Formation [J]. *Advanced Functional Materials*, 2012, 22(22):4711-4717.
- [3] Liu Y, Ai K, Lu L. Polydopamine and Its Derivative Materials: Synthesis and Promising Applications in Energy, Environmental, and Biomedical Fields [J]. *Chemical Reviews*, 2014, 114(9):5057-5115.
